# Supplementary material for: Differences in the Clinical and Molecular Profiles of Subungual Melanoma and Acral Melanoma in Asian Patients
Source: MDPI journal article supplement (doi:10.3390/cancers15174417), 2023-09-04
Supplement: s1 [file s1]

Supplementary Materials

Differences in the Clinical and Molecular Profiles of Subungual Melanoma and Acral Melanoma in Asian Patients

So-Young Ahn, Go Eun Bae, Seung-Yeol Park and Min-Kyung Yeo

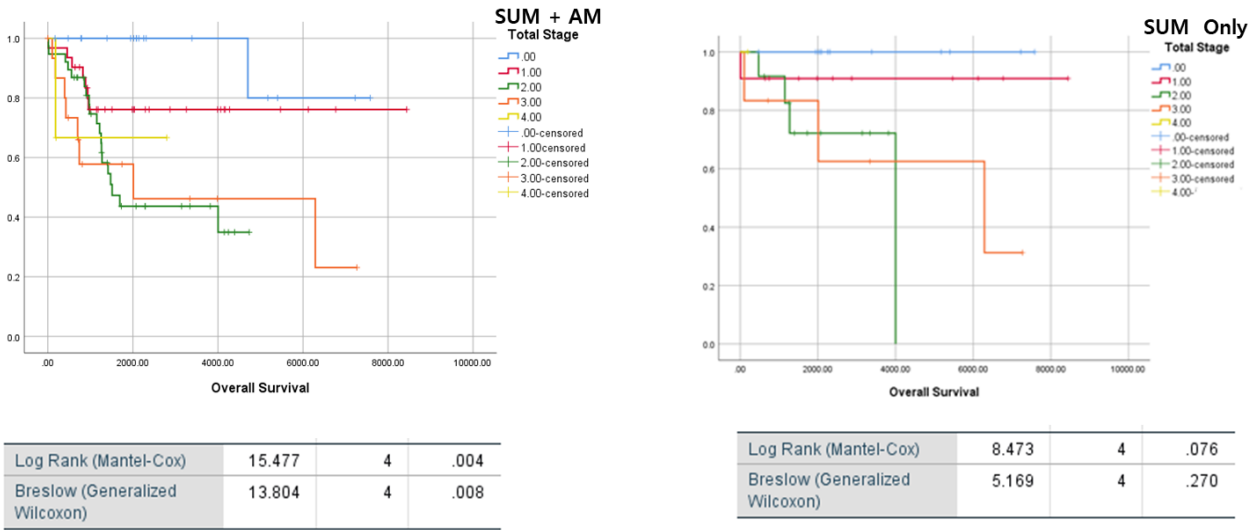

**Figure S1.** Kaplan–Meier curves showing overall survival of patients with SUM and AM stratified according to the stages. (left) All melanoma patients with SUM and AM, including in situ melanoma; (right) patients with invasive melanoma.

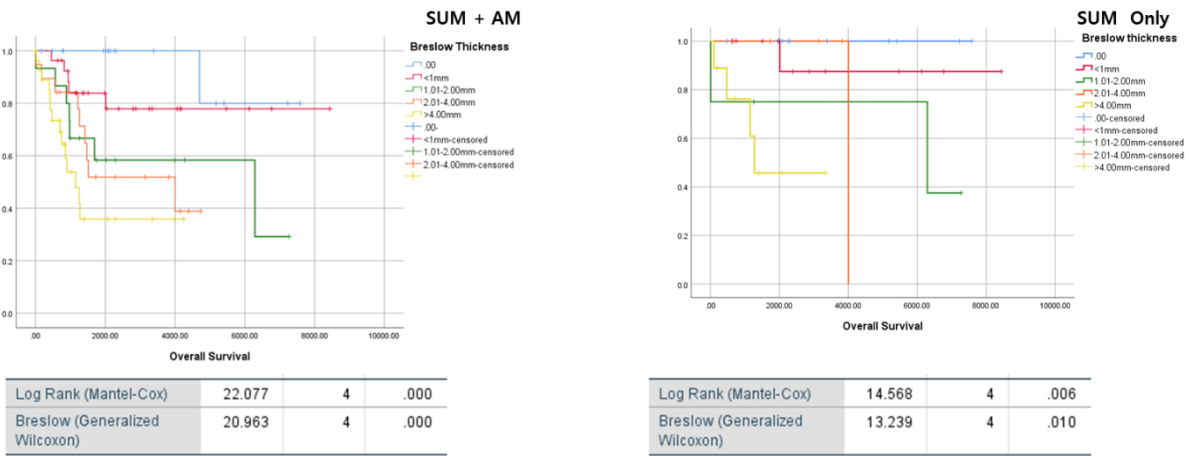

**Figure S2.** Kaplan–Meier curves showing overall survival of patients with SUM and AM stratified according to the Breslow thickness. (left) All melanoma patients with SUM and AM, including in situ melanoma; (right) patients with invasive melanoma.

**Table S1.** Demographic data of 42 patients with subglanular melanoma during 15 years.

| Characteristics                                       | Patients Number (%) |
|-------------------------------------------------------|---------------------|
| Age at diagnosis (mean)                               | 55.7                |
| <b>Sex</b>                                            |                     |
| Male                                                  | 20 (47.6)           |
| Female                                                | 22 (52.4)           |
| <b>Tumor Location</b>                                 |                     |
| Upper                                                 | 29 (69.0)           |
| Lower                                                 | 13 (31.0)           |
| Size (mean, cm)                                       | 1.2 cm              |
| <b>Breslow Thickness</b>                              |                     |
| In situ                                               | 12 (28.6)           |
| <1 mm                                                 | 12 (28.6)           |
| 1.01-2.00mm                                           | 4 (9.5)             |
| 2.01-4.00 mm                                          | 5 (11.9)            |
| >4.00 mm                                              | 9 (21.4)            |
| <b>Clark Level</b>                                    |                     |
| 1                                                     | 12 (28.6)           |
| 2                                                     | 11 (26.2)           |
| 3                                                     | 6 (14.3)            |
| 4                                                     | 5 (11.9)            |
| 5                                                     | 8 (19.0)            |
| <b>Ulceration</b>                                     |                     |
| Absent                                                | 31 (73.8)           |
| Present                                               | 11 (26.2)           |
| Mitotic rate/mm <sup>2</sup> (mean)                   | 3.0/mm <sup>2</sup> |
| <b>Lymph Node Metastasis at the Time of Diagnosis</b> |                     |
| Absent                                                | 35 (83.3)           |
| Present                                               | 7 (16.7)            |
| <b>Distant Metastasis at the Time of Diagnosis</b>    |                     |
| Absent                                                | 41 (97.6)           |
| Present                                               | 1 (2.4)             |
| <b>Stage Group</b>                                    |                     |
| 0                                                     | 12 (28.6)           |
| I                                                     | 11 (26.2)           |
| II                                                    | 12 (28.6)           |
| III                                                   | 6 (14.3)            |
| IV                                                    | 1 (2.4)             |
| <b>Chemotherapy</b>                                   |                     |
| Not done                                              | 30 (71.4)           |
| Done                                                  | 12 (28.6)           |
| <b>Radiotherapy</b>                                   |                     |
| Not done                                              | 39 (73.8)           |
| Done                                                  | 3 (26.2)            |
| <b>Immunotherapy</b>                                  |                     |
| Not done                                              | 31 (73.8)           |
| Done                                                  | 11 (26.2)           |
| <b>Trauma</b>                                         |                     |
| Absent                                                | 37 (88.1)           |
| Present                                               | 5 (11.9)            |

**Table S2.** Gene lists for Oncomine Comprehensive Assay version 3 (n=170).

| <b>Small nucleotide variant and indels (Hotspot genes, n=170, from DNA)</b>                                                                                                                                                                                                                                                                                                                                                                                                                                                                                                                                                                                                                                                                                                                                                            |        |        |        |        |        |
|----------------------------------------------------------------------------------------------------------------------------------------------------------------------------------------------------------------------------------------------------------------------------------------------------------------------------------------------------------------------------------------------------------------------------------------------------------------------------------------------------------------------------------------------------------------------------------------------------------------------------------------------------------------------------------------------------------------------------------------------------------------------------------------------------------------------------------------|--------|--------|--------|--------|--------|
| ABL1, ABL2, AKT1, AKT2, AKT3, ALK, APC, AR, ARAF, ASXL1, ATM, ATR, AURKA, AURKB, AURKC, AXL, BAP1, BCL2, BRAF, BRCA1, BRCA2, BRD2, BRD3, BRD4, CBFB, CCND1, CCND2, CCND3, CCNE1, CDH1, CDK12, CDK4, CDK6, CDKN1A, CDKN1B, CDKN2A, CDKN2B, CDKN2C, CEBPA, CHEK2, CREBBP, CRKL, CSF1R, CTNNB1, DDR1, DDR2, MAP3K4, MAPK1, MAPK3, MAPK8, MCL1, MDM2, MDM4, MED12, MEN1, MET, MITE, MLH1, MPL, MSH2, MSH6, MTOR, MYC, MYCN, MYD88, NF1, NF2, NFKBIA, NKX2-1, NOTCH1, NOTCH2, NOTCH3, NOTCH4, NPM1, NRAS, NTRK1, NTRK2, NTRK3, NUTM1, PDGFB, PDGFRA, PDGFRB, PIK3CA, PIK3CB, PIK3CD, PIK3R1, PIK3R2, POLE, PPARG, PTCH1, PTEN, RAB35, RAD50, RAF1, RARA, RB1, RET, RHEB, RICTOR, RNF43, ROS1, RSPO1, RSPO2, RUNX1, SMAD2, SMAD4, SMARCA4, SMARCB1, SMO, SRC, STK11, SYK, TET2, TMRSS2, TOP2A, TP53, TSC1, TSC2, VHL, WT1, XPO1, ZNRF3, TERT |        |        |        |        |        |
| <b>Copy number variation (n=47, from DNA)</b>                                                                                                                                                                                                                                                                                                                                                                                                                                                                                                                                                                                                                                                                                                                                                                                          |        |        |        |        |        |
| AKT1                                                                                                                                                                                                                                                                                                                                                                                                                                                                                                                                                                                                                                                                                                                                                                                                                                   | FGFR1  | MDM2   | PPARG  | CCND3  | NTRK2  |
| AR                                                                                                                                                                                                                                                                                                                                                                                                                                                                                                                                                                                                                                                                                                                                                                                                                                     | FGFR2  | MDM4   | TERT   | CDK2   | NTRK3  |
| CCND1                                                                                                                                                                                                                                                                                                                                                                                                                                                                                                                                                                                                                                                                                                                                                                                                                                  | FGFR3  | MET    | AKT2   | CDKN2A | PDGFRB |
| CCNE1                                                                                                                                                                                                                                                                                                                                                                                                                                                                                                                                                                                                                                                                                                                                                                                                                                  | FGFR4  | MYC    | AKT3   | CDKN2B | PIK3CB |
| CDK4                                                                                                                                                                                                                                                                                                                                                                                                                                                                                                                                                                                                                                                                                                                                                                                                                                   | FLT3   | MYCL   | ALK    | ESR1   | RICTOR |
| CDK6                                                                                                                                                                                                                                                                                                                                                                                                                                                                                                                                                                                                                                                                                                                                                                                                                                   | IGF1R  | MYCN   | AXL    | FGF19  | TSC1   |
| EGFR                                                                                                                                                                                                                                                                                                                                                                                                                                                                                                                                                                                                                                                                                                                                                                                                                                   | KIT    | PDGFRA | BRAF   | FGF3   | TSC2   |
| ERBB2                                                                                                                                                                                                                                                                                                                                                                                                                                                                                                                                                                                                                                                                                                                                                                                                                                  | KRAS   | PIK3CA | CCND2  | NTRK1  |        |
| <b>Fusions and splice variants (n=51 from RNA)</b>                                                                                                                                                                                                                                                                                                                                                                                                                                                                                                                                                                                                                                                                                                                                                                                     |        |        |        |        |        |
| ALK                                                                                                                                                                                                                                                                                                                                                                                                                                                                                                                                                                                                                                                                                                                                                                                                                                    | FGFR1  | ROS1   | FLT3   | NOTCH4 | RAD51B |
| AXL                                                                                                                                                                                                                                                                                                                                                                                                                                                                                                                                                                                                                                                                                                                                                                                                                                    | FGFR2  | AKT2   | JAK2   | NRG1   | RB1    |
| BRAF                                                                                                                                                                                                                                                                                                                                                                                                                                                                                                                                                                                                                                                                                                                                                                                                                                   | FGFR3  | AR     | KRAS   | NTRK2  | RELA   |
| EGFR                                                                                                                                                                                                                                                                                                                                                                                                                                                                                                                                                                                                                                                                                                                                                                                                                                   | NTRK1  | BRCA1  | MDM4   | NUTM1  | RSPO2  |
| ERBB2                                                                                                                                                                                                                                                                                                                                                                                                                                                                                                                                                                                                                                                                                                                                                                                                                                  | NTRK3  | BRCA2  | MET    | PDGFRB | RSPO3  |
| ERG                                                                                                                                                                                                                                                                                                                                                                                                                                                                                                                                                                                                                                                                                                                                                                                                                                    | PDGFRA | CDKN2A | MYB    | PIK3CA | TERT   |
| ETV1                                                                                                                                                                                                                                                                                                                                                                                                                                                                                                                                                                                                                                                                                                                                                                                                                                   | PPARG  | ERBB4  | MYBL1  | PRKACA |        |
| ETV4                                                                                                                                                                                                                                                                                                                                                                                                                                                                                                                                                                                                                                                                                                                                                                                                                                   | RAF1   | ESR1   | NF1    | PRKACB |        |
| ETV5                                                                                                                                                                                                                                                                                                                                                                                                                                                                                                                                                                                                                                                                                                                                                                                                                                   | RET    | FGR    | NOTCH1 | PTEN   |        |

**Table S3.** Melanoma patients enrolled in pathology archives in a single institute (CNUH) from 200 to 2022 (15 years).

| <b>Cutaneous</b>                                                  |  | 245 | 81%  |
|-------------------------------------------------------------------|--|-----|------|
| Acral                                                             |  | 151 | 50%  |
| Subungual (28% of AM)                                             |  | 43  | 14%  |
| Other Cutaneous (Superficial Spreading, Nodular, Lentigo Maligna) |  | 94  |      |
| <b>Mucosal</b>                                                    |  | 47  | 16%  |
| Oral and Nasal                                                    |  | 35  |      |
| Digestive Tract (Including Anorectal)                             |  | 7   |      |
| Vulvovaginal                                                      |  | 4   |      |
| Genitourinary (Including Penis)                                   |  | 1   |      |
| <b>Ocular</b>                                                     |  | 10  | 3%   |
| Including Conjunctiva                                             |  |     |      |
| <b>Total</b>                                                      |  | 302 | 100% |
